# Supplementary material for: Preparation, reactivity and controlled release of SAMs of calix[4,6]arenes and calix[6]arene-based rotaxanes and pseudorotaxanes formed on polycrystalline Cu
Source: Royal Society of Chemistry journal article supplement (doi:10.1039/c0cp01921f), 2011-01-01
Supplement: c0cp01921f.pdf [file c0cp01921f.pdf]

## Supporting Information

**Title:** Preparation, Reactivity and Controlled Release of SAMs of Calix[4,6]arenes and Calix[6]arene-based Rotaxanes and Pseudorotaxanes Formed on Polycrystalline Cu, studied by XPS  
**Author(s):** Alice Boccia, Valeria Lanzilotto, Valeria Di Castro, Robertino Zannoni,\* Arturo Arduini, Luca Pescatori, and Andrea Secchi\*

### TABLE OF CONTENTS

|                                                                                                                                      |    |
|--------------------------------------------------------------------------------------------------------------------------------------|----|
| <b>Figure S1.</b> <sup>1</sup> H NMR spectrum (CDCl <sub>3</sub> , 300 MHz) of calix[4]arene <b>4</b> .....                          | S2 |
| <b>Figure S2.</b> <sup>1</sup> H NMR spectrum (CDCl <sub>3</sub> , 300 MHz) of calix[4]arene <b>5</b> .....                          | S2 |
| <b>Figure S3.</b> <sup>1</sup> H NMR spectrum (CDCl <sub>3</sub> , 300 MHz).of viologen-based “axle” <b>13</b> .....                 | S3 |
| <b>Figure S4.</b> <sup>1</sup> H NMR spectrum (CDCl <sub>3</sub> , 300 MHz).of viologen-based “axle” <b>15</b> .....                 | S3 |
| <b>Figure S5.</b> <sup>1</sup> H NMR spectrum (C <sub>6</sub> D <sub>6</sub> , 300 MHz) of pseudorotaxane <b>6</b> ⊃ <b>13</b> ..... | S4 |
| <b>Figure S6.</b> 2D COSY spectrum (C <sub>6</sub> D <sub>6</sub> , 300 MHz) of pseudorotaxane <b>6</b> ⊃ <b>13</b> .....            | S4 |
| <b>Figure S7.</b> <sup>1</sup> H NMR spectrum (C <sub>6</sub> D <sub>6</sub> , 300 MHz) of pseudorotaxane <b>6</b> ⊃ <b>15</b> ..... | S5 |
| <b>Figure S8.</b> 2D COSY spectrum (C <sub>6</sub> D <sub>6</sub> , 300 MHz) of pseudorotaxane <b>6</b> ⊃ <b>15</b> .....            | S5 |
| <b>Figure S9.</b> S 2p and N 1s XPS spectra of Cu/ <b>6</b> ⊃ <b>13</b> before and after 1 min biasing.....                          | S6 |
| <b>Figure S10.</b> S 2p and N 1s XPS spectra of Cu/ <b>6</b> ⊃ <b>15</b> before and after 1 min biasing.....                         | S7 |
| <b>Figure S11.</b> S 2p and N 1s XPS spectra of Cu/ <b>6</b> ⊃ <b>15</b> before and after 3 min biasing.....                         | S8 |



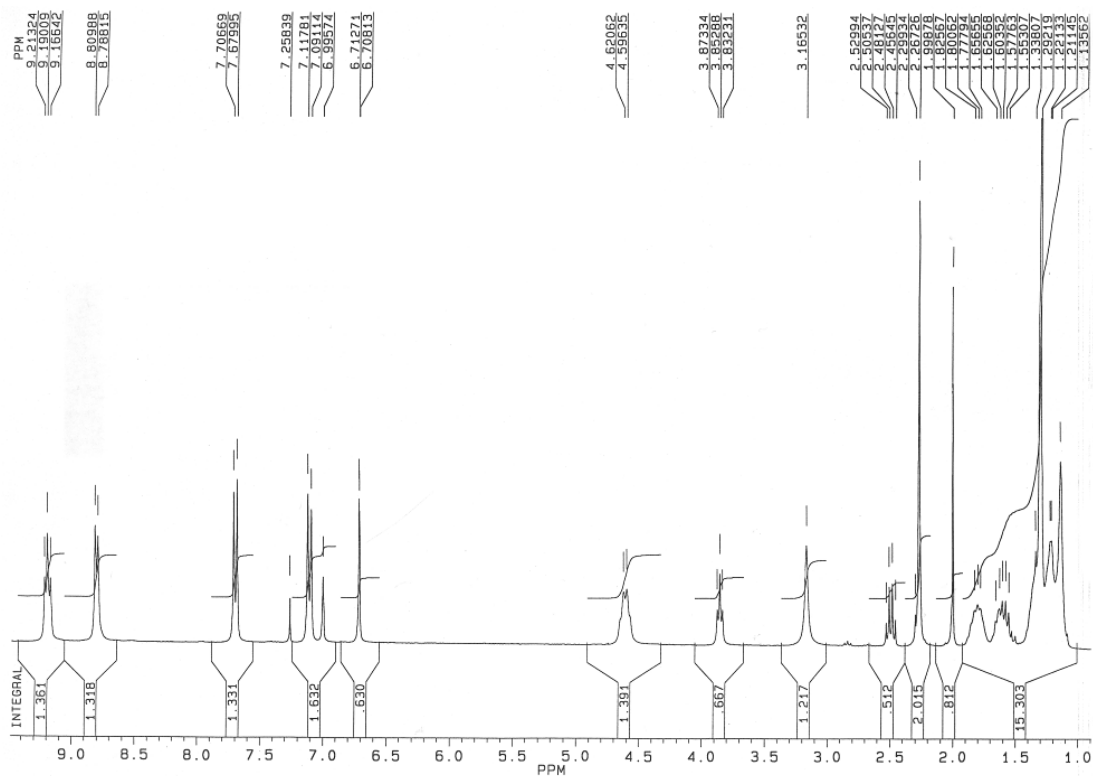

Figure S3.  $^1\text{H}$  NMR spectrum ( $\text{CDCl}_3$ , 300 MHz) of viologen-based “axle” 13

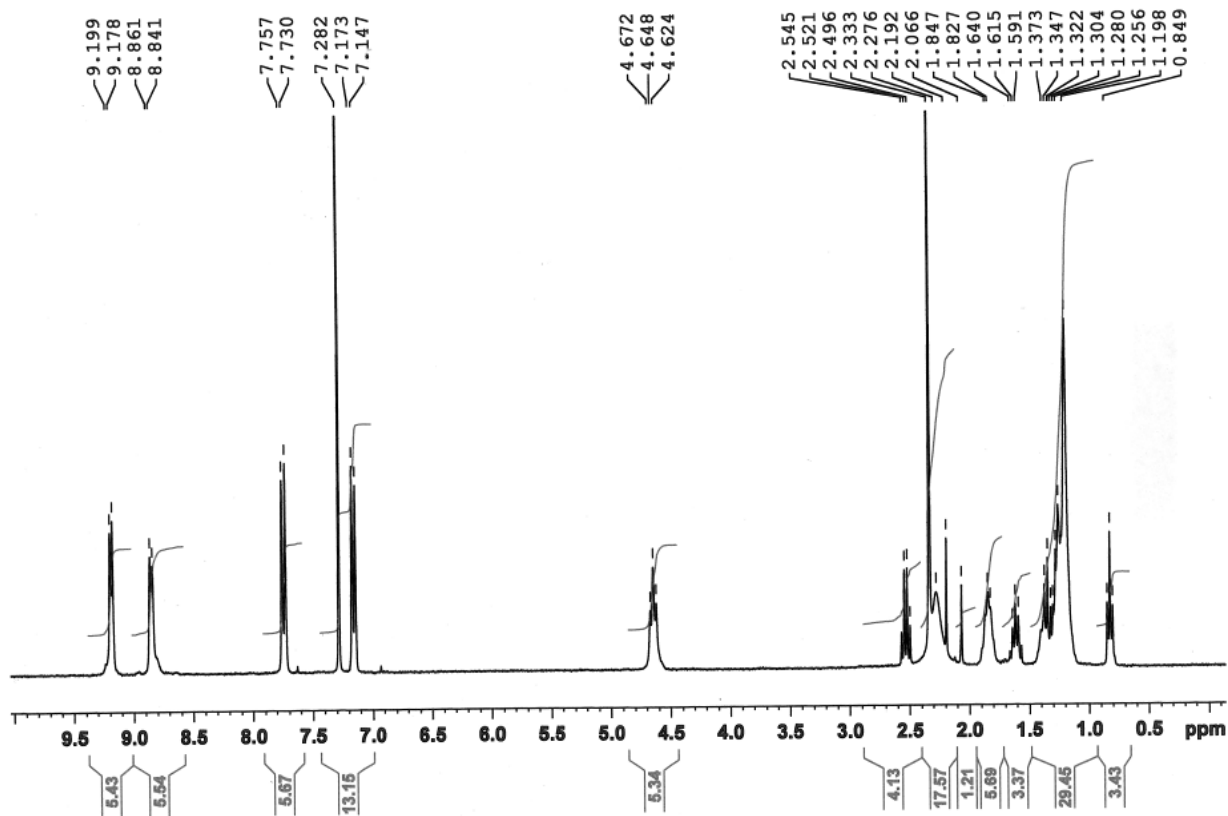

Figure S4.  $^1\text{H}$  NMR spectrum ( $\text{CDCl}_3$ , 300 MHz) of viologen-based “axle” 15.

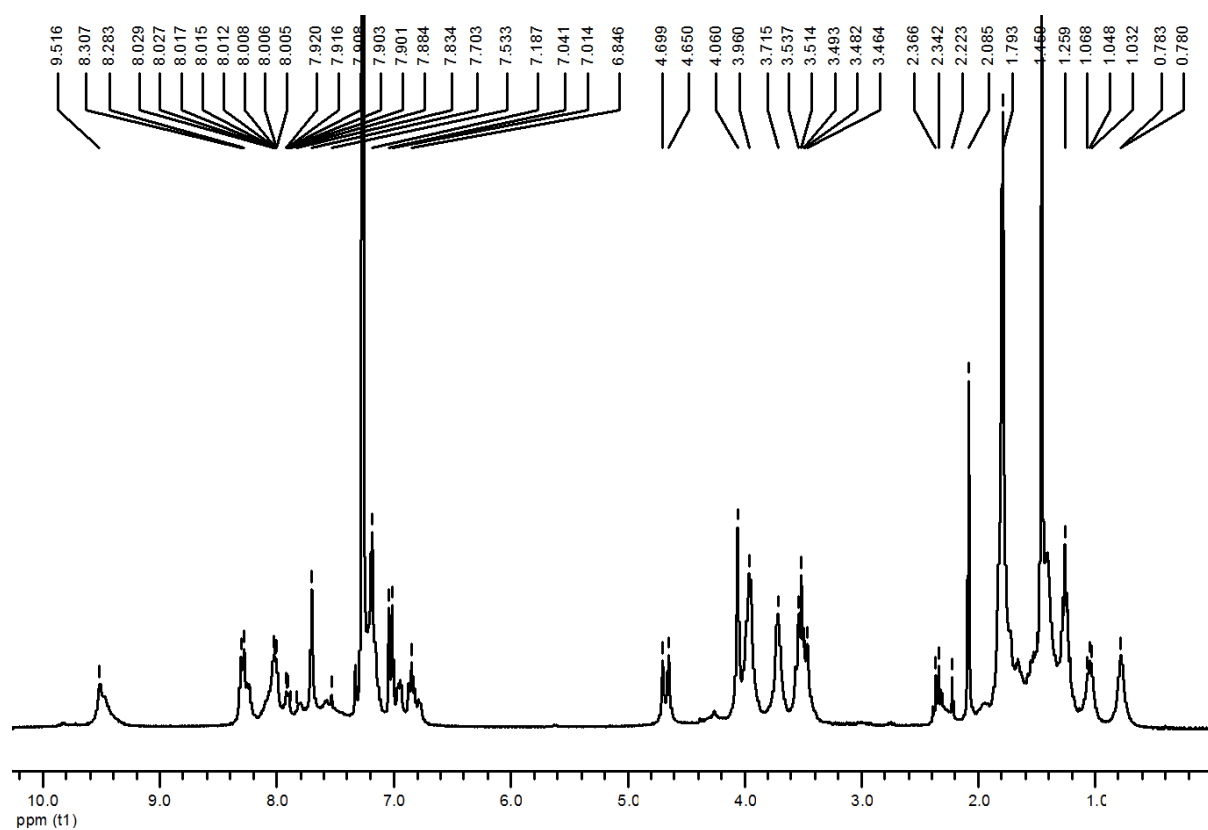

Figure S5.  $^1\text{H}$  NMR spectrum ( $\text{C}_6\text{D}_6$ , 300 MHz) of pseudorotaxane **6D13**.

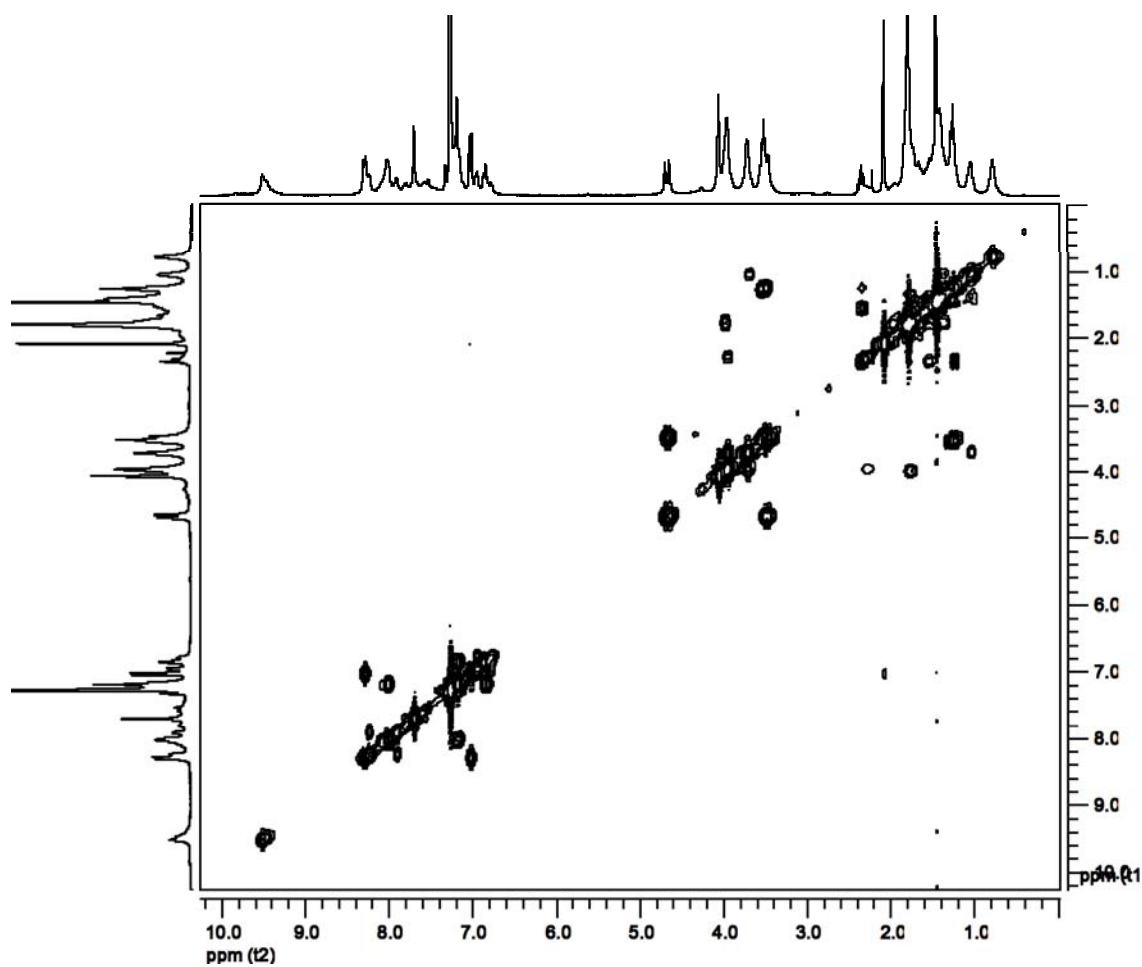

**Figure S6.** 2D COSY spectrum ( $C_6D_6$ , 300 MHz) of pseudorotaxane **6**⊃**13**.

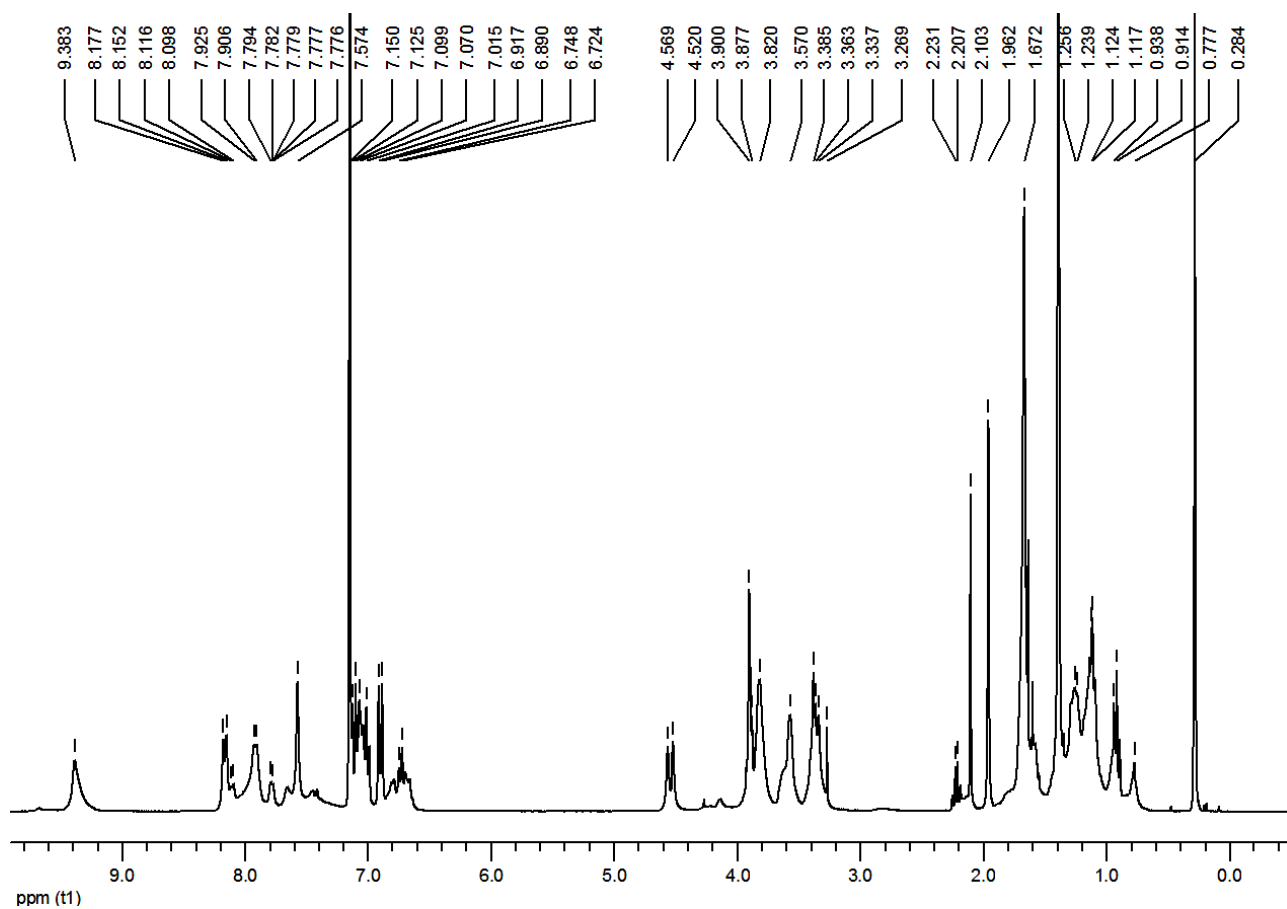

**Figure S7.**  $^1H$  NMR spectrum ( $C_6D_6$ , 300 MHz) of pseudorotaxane **6**⊃**15**.

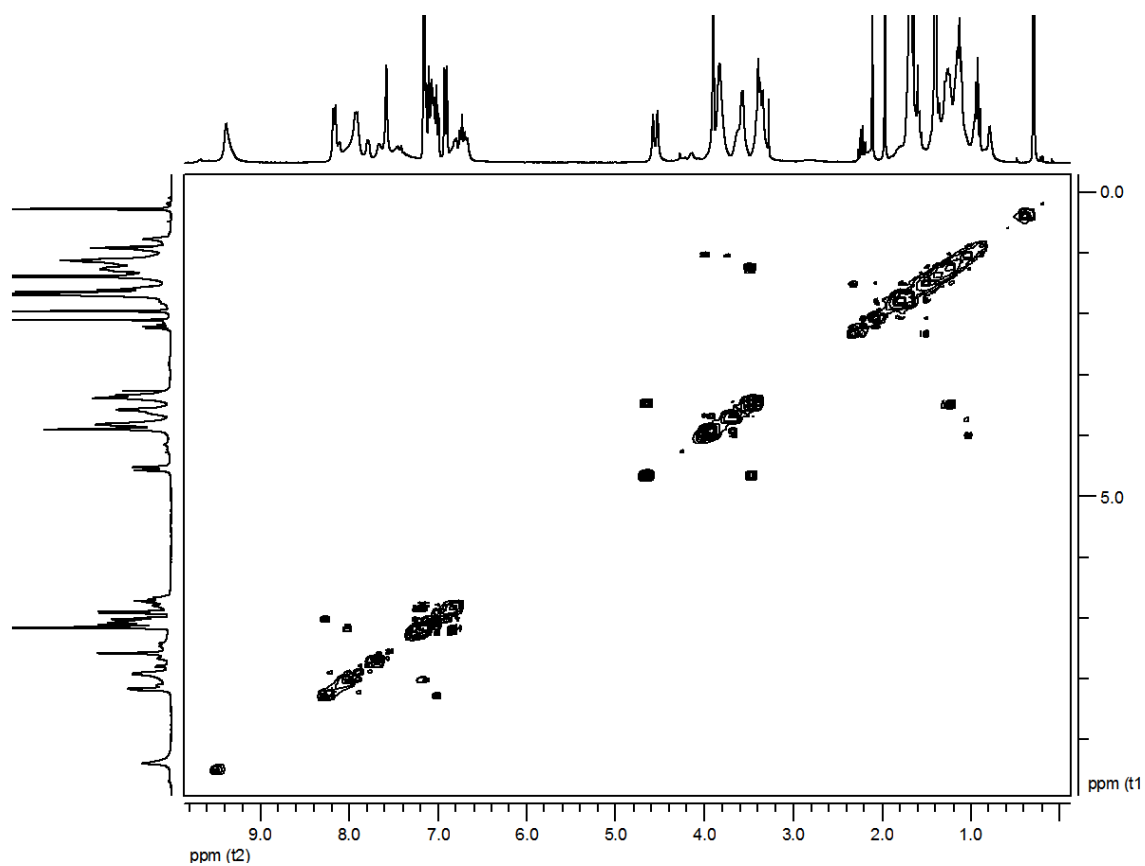

**Figure S8.** 2D COSY spectrum ( $C_6D_6$ , 300 MHz) of pseudorotaxane **6D15**.

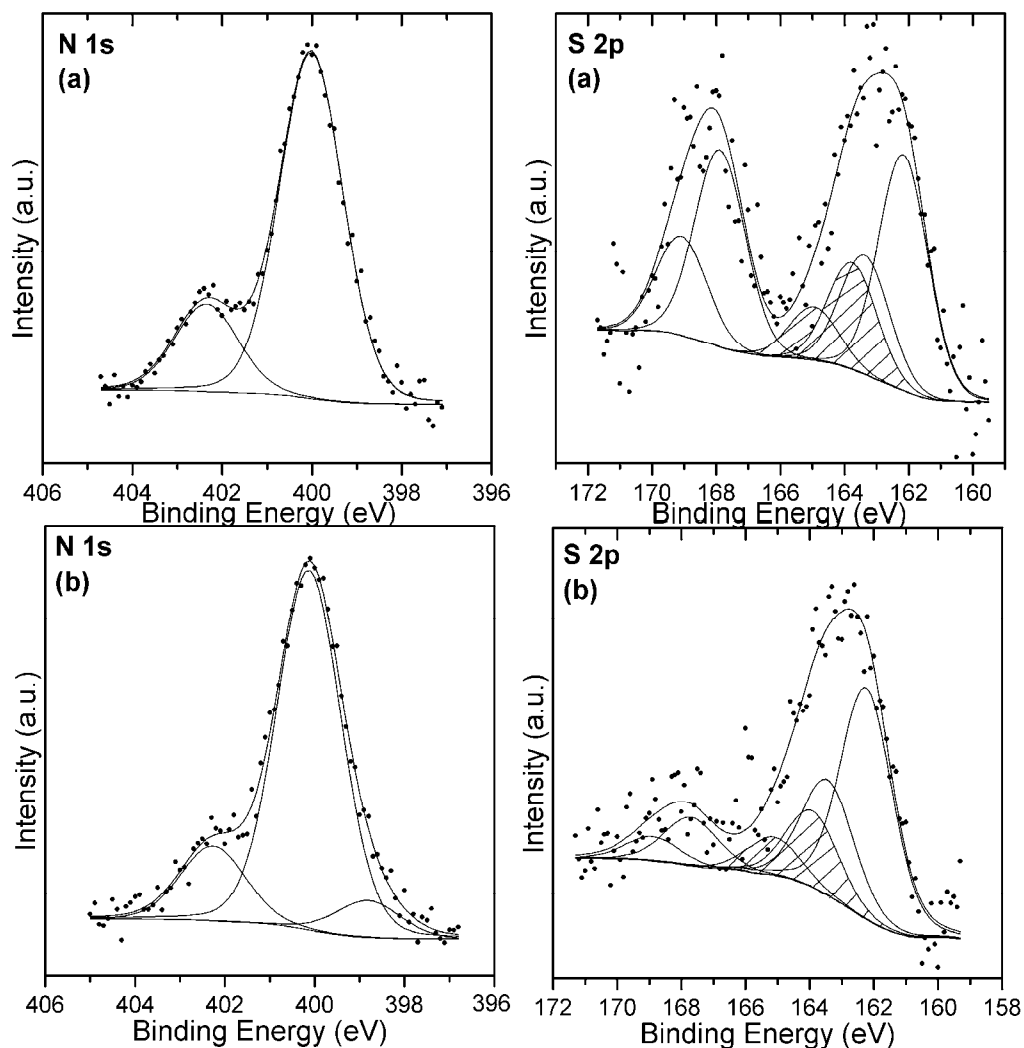

**Figure S9.** S 2p and N 1s XPS spectra of Cu/6D13 before (a) and after (b) 1 min biasing.

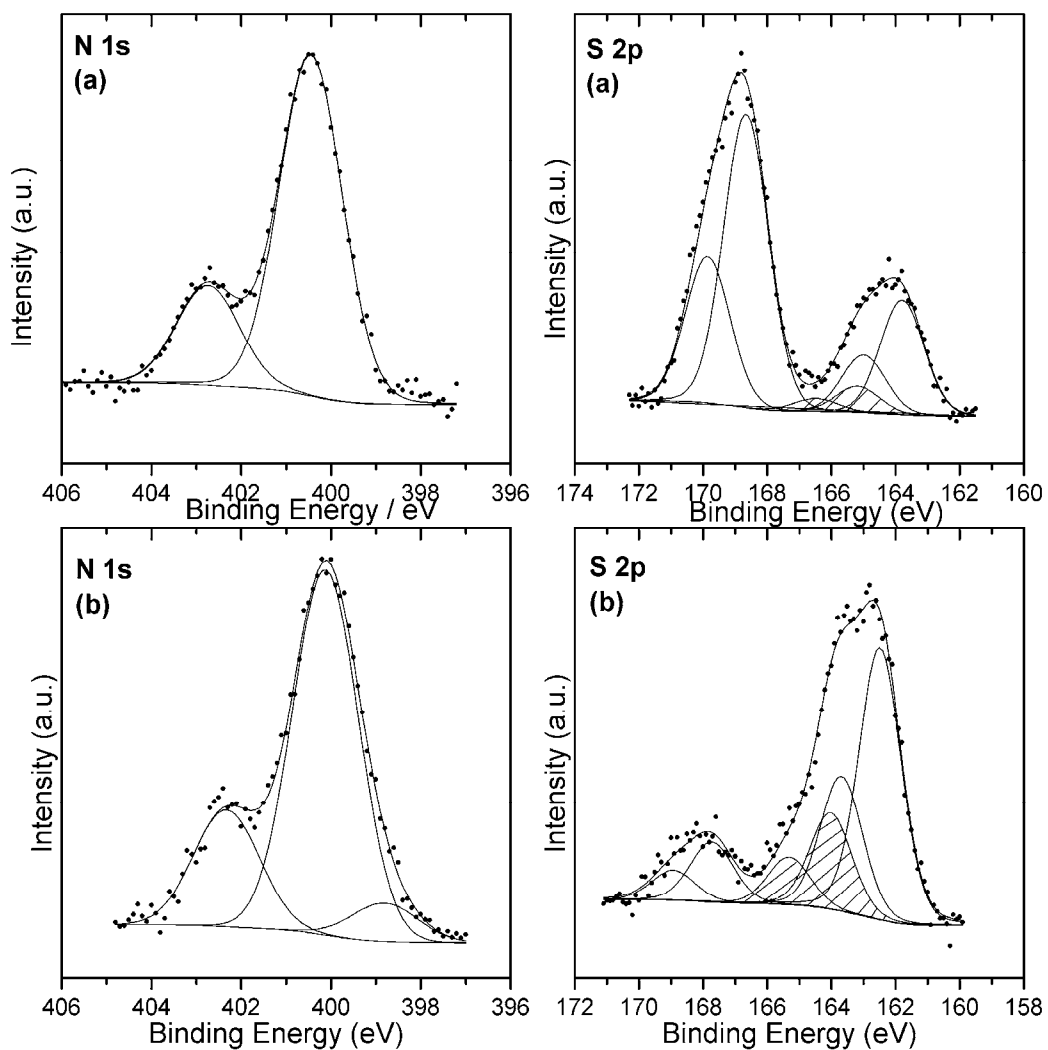

**Figure S10.** S 2p and N 1s XPS spectra of Cu/6-**15** before (a) and after (b) 1 min biasing.



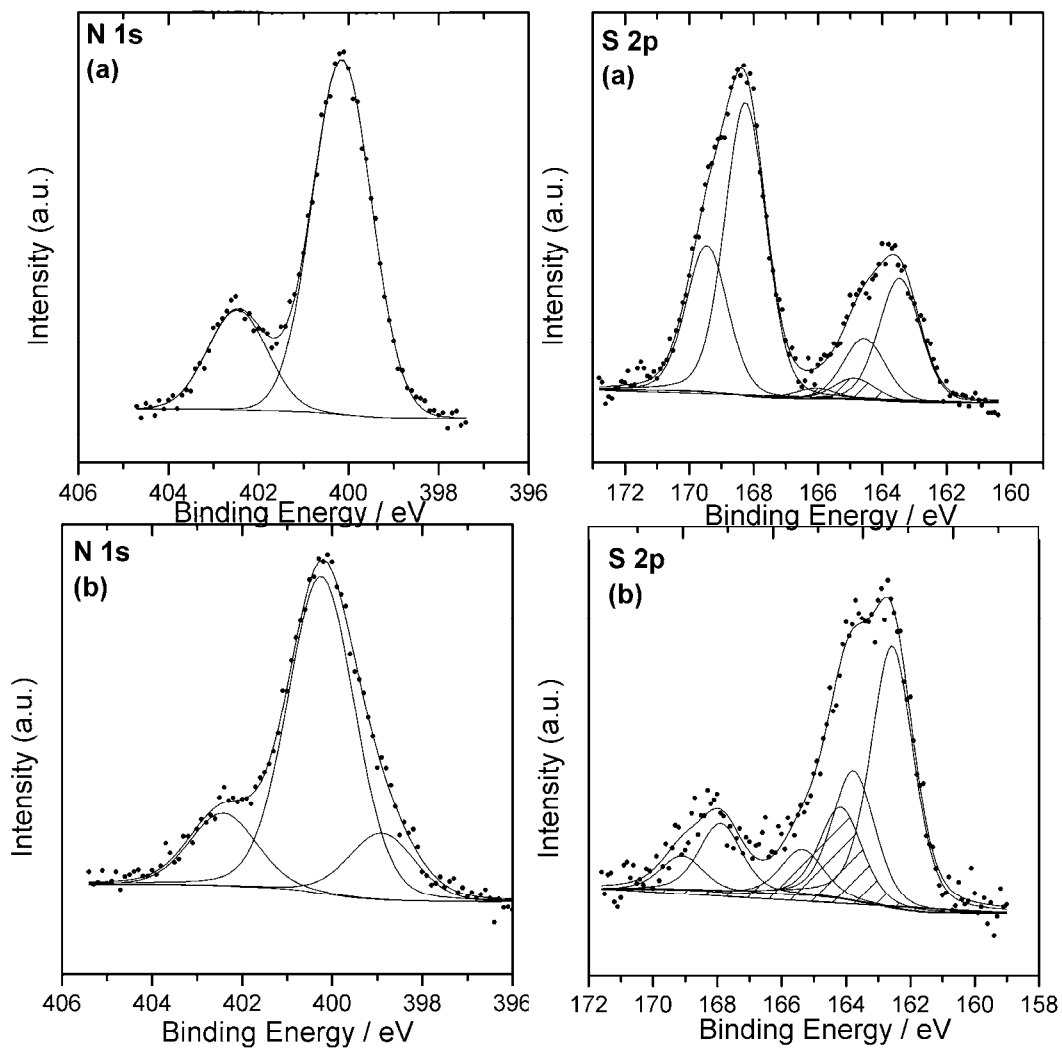

**Figure S11.** S 2p and N 1s XPS spectra of Cu/6D15 before (a) and after (b) 3 min biasing.
